# Supplementary material for: Loss of TrkB Signaling Due to Status Epilepticus Induces a proBDNF-Dependent Cell Death
Source: PubMed Central journal article supplement (PMC6375841; doi:10.3389/fncel.2019.00004), 2019-02-08
Supplement: Data_Sheet_1.pdf [file Data_Sheet_1.pdf]

## *Supplementary Material*

### **Loss of TrkB signaling due to Status Epilepticus induces a proBDNF dependent cell death**

**Laura Ester Montroull<sup>&</sup>, Víctor Danelon<sup>&</sup>, Andrea Beatriz Cragolini<sup>\*</sup> and Daniel Hugo Mascó<sup>\*</sup>.**

Laboratorio de Neurobiología, Instituto de Investigaciones Biológicas y Tecnológicas, Córdoba, Argentina.

**\* Correspondence:**

Dr. Daniel H. Mascó

or

Andrea B. Cragolini

Laboratorio de Neurobiología

Centro de Biología Celular y Molecular

Instituto de Investigaciones Biológicas y Tecnológicas (CONICET-FCEFyN, UNC)

Av. Vélez Sarsfield 1611, X5016 GCA, Córdoba, Argentina

dmasco@fcq.unc.edu.ar

anbecr@gmail.com

## 1. Supplementary Figures and Tables

### 1.1. Supplementary Figures

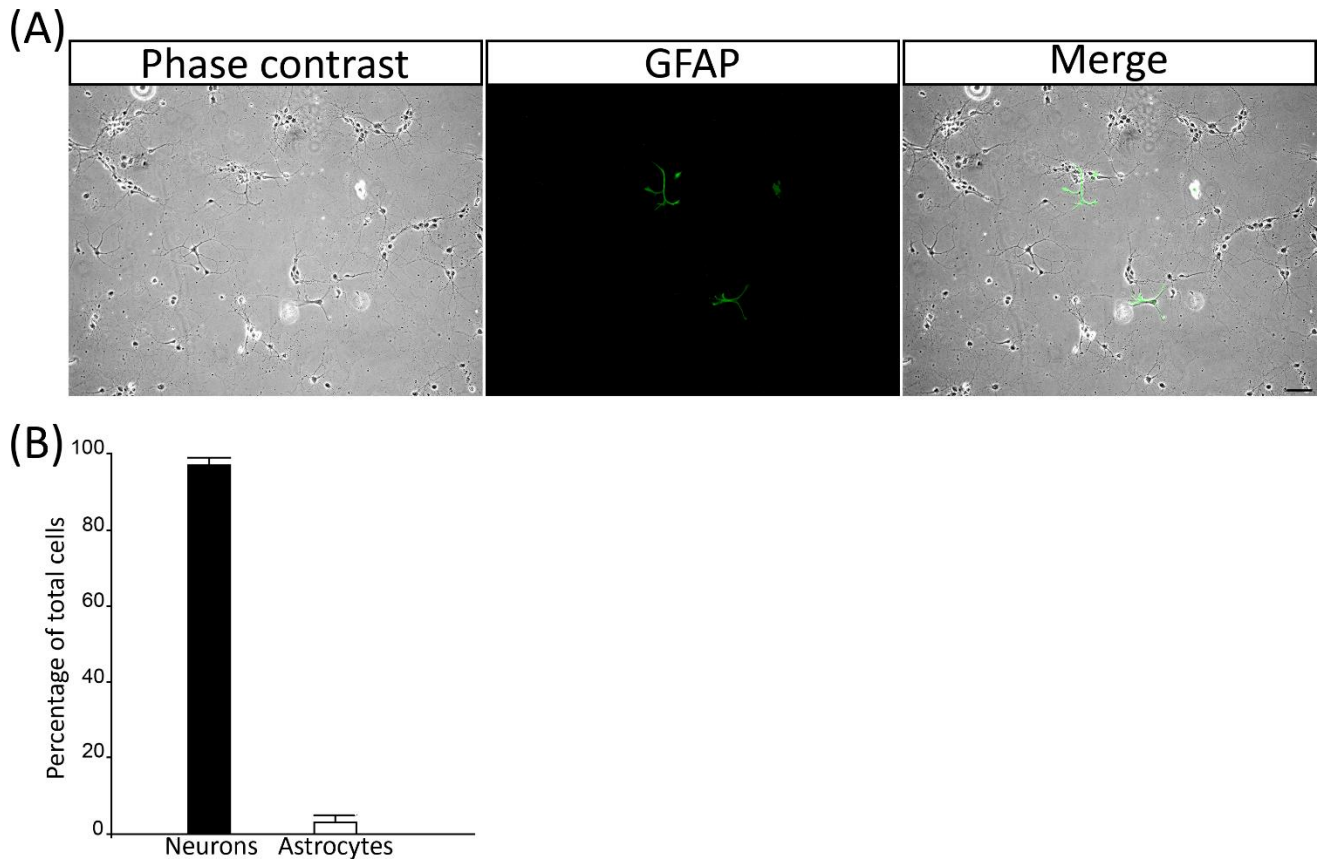

**Supplementary Figure 1.** (A) Representative micrographs showing hippocampal neurons cultures in phase contrast counterstained with astrocytic marker anti-GFAP. Scale bar: 50 $\mu$ m. (B) Quantification of the number of astrocytes present in neuronal cultures show scarce number of astroglial cells in neuronal cultures. Data are expressed as mean  $\pm$  SEM (n=3 independent experiments with 3 pseudo-replicates per experiment).

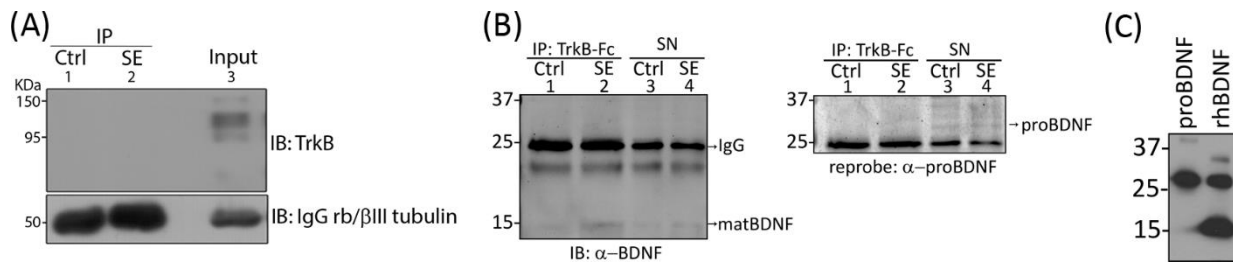

**Supplementary Figure 2. TrkB is not able to interact with proBDNF.** (A) Representative immunoblot showing not detection of proBDNF when TrkB is immunoprecipitated in control and 6h after SE *in vitro* (IP lanes: 1 and 2). Lane 3 shows TrkB immunoblot in the input. The membrane was probed against IgG rabbit to control for equal protein loading between wells and against βIII tubulin as a loading control for the input lane. (B) The hippocampus from control or SE animals were homogenized and immunoprecipitated with TrkB-Fc. Lines 1 and 2 from the left panel show matBDNF immunoprecipitated with TrkB-Fc. Lines 3 and 4 show also matBDNF in the supernatant. No interaction between TrkB-Fc and proBDNF was observed. Right panel show the same membrane re-probed with a specific antibody against proBDNF. Lines 3 and 4 show detection of proBDNF in the supernatant but not in the IP (line 1 and 2). (C) Positive controls for matBDNF and proBDNF were run to confirm the molecular weight of these proteins.
